1 **Clinical metagenomic identification of *Balamuthia mandrillaris* encephalitis**  
2 **and assembly of the draft genome: the critical need for reference strain**  
3 **sequencing**

4  
5 Alexander L. Greninger<sup>1,2†</sup>, Kevin Messacar<sup>3†</sup>, Thelma Dunnebacke<sup>4</sup>, Samia N.  
6 Naccache<sup>1,2</sup>, Scot Federman<sup>1,2</sup>, Jerome Bouquet<sup>1,2</sup>, David Mirsky<sup>3</sup>, Yosuke  
7 Nomura<sup>3</sup>, Shigeo Yagi<sup>4</sup>, Carol Glaser<sup>4</sup>, Michael Vollmer<sup>5</sup>, Craig A. Press<sup>3</sup>, Bette  
8 K. Klenschmidt-DeMasters<sup>3</sup>, Samuel R. Dominguez<sup>3</sup>, Charles Y. Chiu<sup>1,2\*</sup>

9  
10 <sup>1</sup>Department of Laboratory Medicine, University of California, San Francisco, CA,  
11 USA 94107

12 <sup>2</sup>UCSF-Abbott Viral Diagnostics and Discovery Center, San Francisco, CA, USA,  
13 91407

14 <sup>3</sup>Children's Hospital Colorado and University of Colorado School of Medicine,  
15 Aurora, CO, USA

16 <sup>4</sup>California Department of Public Health, Richmond, CA, USA

17 <sup>5</sup>John Muir Hospital, Walnut Creek, CA, USA

18

19 †These authors contributed equally to this paper.

20 \*corresponding author

21 Charles Chiu, MD/PhD

22 Department of Laboratory Medicine and Medicine / Infectious Diseases

23 University of California, San Francisco

24 185 Berry Street, Box 0134, San Francisco, CA 94107

25 Phone:

26 E-mail: [charles.chiu@ucsf.edu](mailto:charles.chiu@ucsf.edu)

27

28 Running title: Metagenomic diagnosis and genome of *Balamuthia*

29

30 Keywords: metagenomics, *Balamuthia mandrillaris*, whole-genome sequencing,

31 reference databases, SURPI, mitochondrial genome, comparative genomics,

32 next-generation sequencing, primary amoebic meningoencephalitis (PAM),

33 encephalitis, genomic medicine

34

35

36 **ABSTRACT**

37 Primary amoebic meningoencephalitis (PAM) is a rare, often lethal cause of  
38 encephalitis, for which early diagnosis and prompt initiation of combination  
39 antimicrobials may improve clinical outcomes. In this study, we present the first  
40 draft assembly of the *Balamuthia mandrillaris* genome recovered from a rare  
41 survivor of PAM, in total comprising 49 Mb of sequence. Comparative analysis of  
42 the mitochondrial genome and high-copy number genes from 6 additional  
43 *Balamuthia mandrillaris* strains demonstrated remarkable sequence variation,  
44 with the closest homologs corresponding to other amoebae, hydroids, algae,  
45 slime molds, and peat moss,. We also describe the use of unbiased  
46 metagenomic next-generation sequencing (NGS) and SURPI bioinformatics  
47 analysis to diagnose an ultimately fatal case of *Balamuthia mandrillaris*  
48 encephalitis in a 15-year old girl. Real-time NGS testing of a hospital day 6 CSF  
49 sample detected *Balamuthia* on the basis of high-quality hits to 16S and 18S  
50 ribosomal RNA sequences present in the National Center for Biotechnology  
51 Information (NCBI) nt reference database. Retrospective analysis of a day 1 CSF  
52 sample revealed that more timely identification of *Balamuthia* by metagenomic  
53 NGS, potentially resulting in a better outcome, would have required availability of  
54 the complete genome sequence. These results underscore the diverse  
55 evolutionary origins underpinning this eukaryotic pathogen, and the critical  
56 importance of whole-genome reference sequences for microbial detection by  
57 NGS.

58

59

## 60 **BACKGROUND**

61 *Balamuthia mandrillaris* is a free-living amoeba that is a rare, almost  
62 uniformly lethal, cause of primary amoebic encephalitis (PAM) in humans  
63 (Visvesvara 1993). Originally isolated from the brain of a baboon at the San  
64 Diego Zoo in 1986, *Balamuthia mandrillaris* has since been reported in over 100  
65 cases of PAM worldwide (Visvesvara et al. 1990; Schuster et al. 2006; Matin et  
66 al. 2008), and amoebae associated with fatal encephalitis in a child have been  
67 cultured directly from soil (Schuster et al. 2003). The vast majority of cases are  
68 fatal, although there are a few published case reports of patients surviving  
69 *Balamuthia* encephalitis after receiving combination antimicrobial therapy and in  
70 vitro data supporting the potential efficacy of several antimicrobial agents  
71 (Schuster and Visvesvara 1996; Deetz et al. 2003; Schuster et al. 2006; Martinez  
72 et al. 2010; Ahmad et al. 2013; Kato et al. 2013). Despite the availability of  
73 validated RT-PCR assays for the detection of free-living amoebae (Yagi et al.  
74 2005; Qvarnstrom et al. 2006), PAM is not often clinically suspected and the  
75 diagnosis is most commonly made around the time of death or post-mortem on  
76 brain biopsy (Schuster et al. 2004; Perez and Bush 2007).

77 Our lab has demonstrated the capacity of metagenomic next-generation  
78 sequencing (NGS) to provide clinically actionable information in a number of  
79 acute infectious diseases, most notably encephalitis (Wilson et al. 2014;  
80 Naccache et al. 2015). This approach enables the rapid and simultaneous  
81 detection of viruses, bacteria, and eukaryotic parasites in clinical samples

82 (Naccache et al. 2014). Encephalitis is a critical illness with a broad differential,  
83 for which unbiased diagnostic tools such as metagenomic NGS can make a  
84 significant impact (Schubert and Wilson 2015). However, the utility of diagnostic  
85 NGS is highly dependent on the breadth and quality of databases that contain  
86 whole-genome sequence information of reference strains needed for alignment  
87 (Fricke and Rasko 2014).

88 In this study, we describe the first draft genome sequence of a strain of  
89 *Balamuthia mandrillaris* from a rare survivor of PAM and comparative sequence  
90 analysis of 6 additional mitochondrial genomes. We also demonstrate the ability  
91 of metagenomic NGS to rapidly detect *Balamuthia mandrillaris* from the  
92 cerebrospinal fluid (CSF) of an critically ill 15-year old, and highlight the  
93 importance of genomic reference sequences by retrospective analysis of a  
94 hospital day (HD) 1 sample.

95

## 96 **RESULTS**

97

### 98 **First mitochondrial genome of *Balamuthia mandrillaris***

99 We cultured *Balamuthia mandrillaris* strain 2046 in axenic media from a  
100 brain biopsy corresponding to a rare survivor of PAM (Vollmer and Glaser,  
101 manuscript in review). Sequencing of DNA extracted from the axenic culture  
102 generated 3.8 million 75 base pair (bp) mate-pair reads with an average insert  
103 size of 2,187 bp. *De novo* assembly yielded a circular mitochondrial genome of  
104 41,656 bases that was comprised of 64.8% AT at 2,082X coverage (Fig. 1A).

105 The overall size and AT content of the *Balamuthia mandrillaris* mitochondrial  
106 genome was closer to that of *Acanthamoeba castellanii* (41,591 bp, 70.6% AT)  
107 (Burger et al. 1995) than *Naegleria fowleri* (49,531 bp, 74.8% AT) (Herman et al.  
108 2013), although overall average nucleotide identity with *Balamuthia* was found to  
109 be low for both amoebae (~68%).

110 The *Balamuthia mandrillaris* 2046 mitochondrial genome contained 2  
111 ribosomal RNA (rRNA) genes, 18 transfer RNA (tRNA) genes, and 38 coding  
112 sequences, with 5 of those being hypothetical proteins. The organization of the  
113 mitochondrial genome retained several syntenic blocks with the *Acanthamoeba*  
114 *castellanii* genome, including *tnad3-9-7-atp6* and *rpl11-rps12-rps7-rpl2-rps19-*  
115 *rps3-rpl16-rpl14*. However, many other features of the genome were unique,  
116 such as the order of the remaining coding blocks, the lack of a combined  
117 *cox1/cox2* gene, as present in *Acanthamoeba castellanii* (Burger et al. 1995), and  
118 the lack of intron splicing in 23S rRNA. The *Balamuthia mandrillaris* mitochondrial  
119 *cox1* gene was interrupted by a LAGLIDADG endonuclease open reading frame  
120 (ORF) containing a group I intron, as has been reported for a wide variety of  
121 other eukaryotic species (Fukami et al. 2007; Zheng et al. 2012). The putative  
122 *rps3* gene was encoded within a 1290 bp ORF that, when translated, aligned by  
123 hidden Markov model (HMM) analysis to *rps3* proteins from *Escherichia coli*  
124 (PDB 4TP8/4U26) and *Thermus thermophilus* (PDB 4RB5/4W2F), and only in  
125 base positions 1-66 and 583-1290 of the ORF. This finding was consistent with  
126 the presence of a putative >500 bp intron in the *Balamuthia mandrillaris* *rp3* gene  
127 that to date has only been described to in plants (Laroche and Bousquet 1999;

128 Regina et al. 2005). Alternatively, the ORF was also found to encode a putative  
129 tRNA (Asn) such that the 5' end of the ORF could represent a large intergenic  
130 sequence.

131

### 132 **Mitochondrial Genome Diversity of *Balamuthia mandrillaris***

133 To investigate the extent of sequence diversity in *Balamuthia mandrillaris*,  
134 we sequenced the mitochondrial genomes from 6 additional *Balamuthia* strains  
135 available at the California Department of Public Health and the American Tissue  
136 Culture Collection (Table 1). The 7 total circular mitochondrial genomes  
137 averaged 41,526 bp in size (range 39,996 to 42,217 bp), and shared pairwise  
138 nucleotide identities ranging from 82.6% to 99.8%. The phylogeny revealed the  
139 presence of at least 3 separate lineages of *Balamuthia mandrillaris*, with all of the  
140 strains from California that had been submitted to the California Department of  
141 Public Health clustering together in a single clade (Fig. 1B). Consistent with a  
142 previous report (Booton et al. 2003), we found that the mitochondrial genome of  
143 strain V451 was the most divergent among tested strains, and possessed an  
144 additional 1,149 bp ORF downstream of the *cox1* gene that did not align  
145 significantly to any sequence in the NCBI nt or nr reference database.

146 Putative introns constituted the major source of variation among the  
147 mitochondrial genomes (Fig. 1C). Four strains out of 7, including strain 2046  
148 from the rare survivor of *Balamuthia* infection, contained a 975 bp LAGLIDADG-  
149 containing intron in the *cox1* gene, whereas no such intron was present in the  
150 remaining 3 strains. Two of the remaining 3 strains, strains V451 and V188,

151 instead had an approximately 790 bp insert in the 23S rRNA gene (Figure 1A,  
152 "rnl RNA") that contained a 530 bp or 666 bp LAGLIDADG-containing ORF,  
153 respectively, and that coded for a putative endonuclease. The LAGLIDADG-  
154 containing endonucleases in the 2 strains shared 84% amino acid pairwise  
155 identity with each other, but ~50% amino acid identity to a corresponding  
156 LAGLIDADG-containing endonuclease in the 23S rRNA gene of  
157 *Acanthamoeba castellanii*, and <12% amino acid identity to the LADGLIDADG-  
158 containing cox1 introns in the four other *Balamuthia* strains. The final remaining  
159 strain, ATCC-V039, lacked an intron in either the cox1 or 23S rRNA gene.

160 The ORF containing the rps3 gene, found to contain a possible rps3 intron  
161 or intergenic region by analysis of the strain 2046 mitochondrial genome, varied  
162 in length among the 7 sequenced mitochondrial genomes from 1,290 bp to 1,425  
163 bp. Notably, the length of the putative intron or intergenic region accounted for  
164 all of the differences in overall length of the rps3 gene. Confirmatory PCR and  
165 sequencing of this locus using conserved outside primers revealed that each  
166 strain tested had a unique length and sequence (Fig. 2), raising the possibility of  
167 targeting this region for *Balamuthia mandrillaris* strain detection and genotyping.

168

### 169 **First draft genome of *Balamuthia mandrillaris***

170 Because of the high-copy number of mitochondrial sequences in  
171 *Balamuthia*, as noted previously for *Naegleria fowleri* (Herman et al. 2013), we  
172 performed an additional NGS run of 14.1 million 250 bp single-end reads, and  
173 computationally subtracted reads aligning to the mitochondrial genome.



174 Assembly of the remaining 4.4 million high-quality reads yielded 31,194  
175 contiguous sequences (contigs) with an N50 of 3,411 bp. Scaffolding and gap  
176 closure using an additional 57.4 million NGS reads and computational removal of  
177 exogenous sequence contaminants yielded a final assembly of ~44.3 Mb  
178 comprised of 14,699 scaffolds with an N50 of 19,012 bp (Table 2). Direct  
179 BLASTn alignment of the scaffolds to the National Center for Biotechnology  
180 Information (NCBI) nt database revealed that the most common organism  
181 aligning to *Balamuthia mandrillaris* was *Mus musculus* (house mouse)  
182 (2,067/14,699 = 14.1% of scaffolds), nearly entirely due to low-complexity  
183 sequences, followed by high-significance hits to *Acanthamoeba castellani*  
184 (627/14,699 = 4.3% of scaffolds).

185         Analysis of individual genes from the *Balamuthia* mitochondrial genome  
186 revealed the presence of significant diversity across all kingdoms of life (Fig. 3).  
187 The 18S-28S rRNA locus in the *Balamuthia* mitochondrial genome corresponded  
188 to a 12.5 kB contig sequenced at high coverage (>400X over rRNA regions).  
189 The previously sequenced 18S gene (2,017 bp) demonstrated 99.5% identity to  
190 existing *Balamuthia mandrillaris* 18S rRNA sequences in the NCBI nt database,  
191 while the 28S gene (4999 bp) had homology across multiple diverse species,  
192 with only 68.5% pairwise identity to its closest phylogenetic relative,  
193 *Acanthamoeba castellani* (Fig. 3B). From the nuclear genome, one high-copy  
194 contig contained a truncated 5,250 nucleotide ORF exhibiting only 33% amino  
195 acid identity to *Rhizopus delemar* (pin mold), and harboring elements consistent  
196 with a retrotransposon (Kordis 2005), including an RNase HI from Ty3/Gypsy

197 family retroelements, a reverse transcriptase, a chromodomain, and a  
198 retropepsin. Two high-copy, ~1,600 bp ORFs that failed to match any sequence  
199 by BLASTx alignment to the NCBI nr protein database were found to align  
200 significantly to *Escherichia coli* site-specific recombinase by remote homology  
201 HMM analysis.

202

### 203 **A case of *Balamuthia* encephalitis diagnosed by metagenomic NGS**

204

205 Concurrent with assembly of the *Balamuthia* genome, metagenomic NGS  
206 was performed to investigate a case of meningoencephalitis in a 15-year-old girl  
207 with insulin-dependent diabetes mellitus and celiac disease. The patient initially  
208 presented to a community emergency room with 7 days of progressive symptoms  
209 including right arm weakness, headache, vomiting, ataxia, and confusion. Her  
210 diabetes was well controlled with an insulin pump, and she did not take any  
211 additional medications. Exposure history was significant for contact with alpacas  
212 at a family farm and swimming in a freshwater pond nine months prior. She had  
213 no international travel, sick contacts, or insect bites. She was given 10 mg  
214 dexamethasone with symptomatic improvement in her headaches, but was  
215 subsequently transferred to a tertiary care children's hospital after a computed  
216 tomography scan revealed left occipital and frontal hypodensities.

217 On HD 1, peripheral white blood count was  $11.6 \times 10^3$  cells/ $\mu$ L (89%  
218 neutrophils, 6% lymphocytes, 4% monocytes), erythrocyte sedimentation rate  
219 was 13 mm/hr [normal range 0-20 mm/hr], C-reactive reactive was 3 mg/dL  
220 [normal range 0-1 mg/dL], and procalcitonin 0.05 ng/mL [normal range 0-0.5

221 ng/mL]. CSF analysis demonstrated 377 leukocytes/ $\mu$ L (2% neutrophils, 53%  
222 lymphocytes, 39% monocytes, and 6% eosinophils), glucose of 122 mg/dL  
223 [normal range, 40-75 mg/dL], and protein of 59 mg/dL [normal range, 12-60  
224 mg/dL]. Viral polymerase chain reaction (PCR) testing for herpes simplex virus  
225 (HSV) and bacterial cultures were negative. Magnetic resonance imaging (MRI)  
226 scan of the brain on HD 1 showed hemorrhagic lesions with surrounding edema  
227 in the superior left frontal lobe and left occipital lobe with a small focus of edema  
228 in the right cerebellum (Fig. 4A).

229         Given the patient's autoimmune predisposition and hemorrhagic  
230 appearance of the brain lesions, acute hemorrhagic leukoencephalitis was  
231 initially suspected and intravenous methylprednisolone (1,000 mg daily) was given  
232 HD 2-5. The patient clinically deteriorated with worsening headache, increasing  
233 weakness, and altered mental status on HD 5. Repeat MRI on HD 5  
234 demonstrated enlargement of the previous hemorrhagic lesions with interval  
235 development of multiple rim-enhancing lesions (Fig. 4B). Steroids were  
236 discontinued and broad-spectrum antimicrobial therapy with vancomycin,  
237 cefotaxime, metronidazole, amphotericin B, voriconazole and acyclovir was  
238 initiated. On HD 6, she underwent craniotomy for brain biopsy, revealing partially  
239 necrotic white matter, and had an external ventricular drain placed. CSF wet  
240 mount and gram stain, bacterial and fungal cultures, PCR testing for HSV and  
241 varicella-zoster virus (VZV), and oligoclonal bands were negative. Pathology of  
242 the brain biopsy sample showed a hemorrhagic necrotizing process with  
243 neutrophils, tissue necrosis, vasculitis and numerous amoebae. Parallel

244 metagenomic NGS testing of CSF and brain biopsy samples confirmed the  
245 presence of sequences from *Balamuthia mandrillaris* (see below). She was  
246 additionally started on azithromycin, sulfadizine, pentamidine, and flucytosine on  
247 HD 7. On HD 8, she developed intracranial hypertension, cardiac arrest and  
248 died. Miltefosine had been requested and was en route from the CDC (Schuster  
249 et al. 2006; Martinez et al. 2010; Centers for Disease and Prevention 2013);  
250 however this medication did not arrive in time to administer before the patient  
251 died. Autopsy was not performed according to the wishes of the family.

252

### 253 **Identification of *Balamuthia* in CSF and brain biopsy material**

254 Metagenomic NGS and SURPI bioinformatics analysis were used to  
255 analyze the patient's HD 6 CSF and brain biopsy for potential pathogens.  
256 Analysis of the viral portion of RNA or DNA derived reads revealed only phages  
257 or misannotated sequences (Table S1), while most of the bacterial reads  
258 mapped to common skin / environmental contaminants such as  
259 *Propionibacterium* (12,926 reads) and *Staphylococcaceae* (6,028 reads) in the  
260 RNA library. In contrast, 79% (20,145 of 25,631) of non-chordate (lacking a  
261 backbone) eukaryotic reads that were taxonomically assigned at a species level  
262 from the RNA library were assigned to available 16S and 18S sequences of  
263 *Balamuthia mandrillaris* in the NCBI nt reference database (Booton et al. 2003)  
264 (Table S1; Fig. 5A). A minority of the non-chordate eukaryotic reads aligned to  
265 *Acanthamoeba spp.* (145 reads). Reads to *Balamuthia* were also detected in the  
266 DNA (13 reads) and brain biopsy RNA libraries (8 reads). The coverage of the

267 16S rRNA gene in the RNA library was sufficiently high to assemble a 1,405 bp  
268 full-length contig sharing 99.9% identity with the 2046 strain of *Balamuthia*. In the  
269 18S locus, mapped NGS reads from the patient spanned 98.1% of the gene and  
270 were 99.1% identical by nucleotide. No NGS hits were detected to the RNaseP  
271 gene, the only additional *Balamuthia* gene represented in the NCBI nt reference  
272 database as of August 2015.

273 We then sought to determine in retrospect whether earlier detection and  
274 diagnosis of *Balamuthia* infection in the case patient by NGS would have been  
275 feasible. Metagenomic NGS of a day 1 CSF sample followed by SURPI analysis  
276 using the June 2014 NCBI nt reference database generated no sequence hits to  
277 *Balamuthia* (Fig. 5B; Table S1). However, repeating the analysis after adding the  
278 draft genome sequence of *Balamuthia mandrillaris* to the reference database  
279 resulted in the detection of many additional *Balamuthia* reads (Fig. 5B and C)  
280 Importantly, 9 species-specific DNA reads were detected from day 1 CSF (Fig.  
281 5B, boldface text; Table 3). Although only 2 of 9 putative *Balamuthia* reads had  
282 identifiable translated nucleotide homology to any protein in the NCBI nr  
283 database, one of those reads was found to share 77% amino acid identity to the  
284 gluathione transferase protein from *Acanthamoeba castellanii*, and hence most  
285 likely represented a *bona fide* hit to *Balamuthia*. These findings also indicated  
286 that the detection of *Balamuthia* reads was not due to errors in the draft genome  
287 assembly from incorporation of contaminating sequences from other organisms.  
288 Thus, detection of *Balamuthia* from the patient's day 1 sample and a more timely  
289 diagnosis by metagenomic NGS would presumably not have been made without

290 the availability of the full draft genome as part of the reference database used for  
291 alignment.

292

## 293 **DISCUSSION**

294 In this study, we describe a "virtuous cycle" of clinical sequencing in which  
295 the continually increasing breadth of microbial sequences in reference databases  
296 improves the sensitivity and accuracy of infectious disease diagnosis, in turn  
297 driving the sequencing of additional reference strains. The assembly of the first  
298 draft reference genome for *Balamuthia* not only enhances the potential sensitivity  
299 of metagenomic NGS for detecting this pathogen, as shown here, but also  
300 provides target sequences such as the rps3 intron / intergenic region or high-  
301 copy number 28S rRNA gene that can be leveraged for the future development  
302 of more sensitive and specific diagnostic assays. Given the lack of proven  
303 efficacious treatments for *Balamuthia* encephalitis, it is unclear whether even a  
304 much earlier diagnosis at HD 1 would have impacted the fulminant course of our  
305 case patient's infection. However, it has been suggested that timely intervention  
306 in cases of *Balamuthia* might lead to improved outcome (Bakardjiev et al. 2003).  
307 In addition, promising new experimental treatments such as miltefosine (Schuster  
308 et al. 2006; Martinez et al. 2010; Centers for Disease and Prevention 2013),  
309 administered to the survivor infected by the sequenced 2046 strain (Vollmer and  
310 Glaser, submitted), are now available.

311 Unbiased metagenomic NGS is a powerful approach for diagnosis of  
312 infectious disease because it does not rely on the use of targeted primers and

313 probes, but rather, detects any and all pathogens on the basis of uniquely  
314 identifying sequence information (Chiu 2013). Rapid and accurate bioinformatics  
315 algorithms (Zaharia et al. 2011; Wood and Salzberg 2014; Buchfink et al. 2015;  
316 Freitas et al. 2015) and computational pipelines (Naccache et al. 2014) have also  
317 been developed, with the capacity to analyze metagenomic NGS data in clinically  
318 actionable time frames. Nevertheless, we demonstrate here the critical role of  
319 comprehensive reference genomes in the NGS diagnostic paradigm. The  
320 availability of pathogen genomes with coverage of all clinically relevant  
321 genotypes can maximize the utility of NGS in not only diagnosis of individual  
322 patients (Wilson et al. 2014; Naccache et al. 2015), but also for public health  
323 applications such as transmission dynamics (Grad and Lipsitch 2014) and  
324 outbreak investigation (Briese et al. 2009; Greninger et al. 2015b).

325 In the field of amoebic encephalitis, draft genomes are now available for  
326 *Acanthamoeba castellanii* (Burger et al. 1995), *Naegleria fowleri* (Zysset-Burri et  
327 al. 2014), and *Balamuthia mandrillaris*. However, more sequencing is certainly  
328 necessary to better understand the genetic diversity of these eukaryotic  
329 pathogens. In particular, shotgun sequencing and comparative analysis of  
330 mitochondrial genomes from 7 *Balamuthia* strains uncovered at least 3 unique  
331 lineages, one of which was comprised entirely of amoebae isolated from  
332 California, revealing that geographic differences likely exist among strains (Fig.  
333 1B). This study also identified a unique locus in a putative rps3 intron/intergenic  
334 in the mitochondrial genome that is an attractive target for a clinical genotyping  
335 assay (Figs. 1C and 3). Given the rarity of the disease, it is unknown whether

336 infection by different strains of *Balamuthia* would affect clinical course or  
337 outcome, although the availability of routine genotyping could help in addressing  
338 this question.

339         Limitations to this study include the small number of accessible clinical  
340 samples of *Balamuthia mandrillaris* infection and assembly of a draft genome  
341 with >14,000 scaffolds as a result of restricting the sequencing to short reads.  
342 The use of long read technologies based on single molecular, real-time (SMRT)  
343 or nanopore sequencing will likely be needed to achieve a highly contiguous,  
344 haploid genome. Furthermore, additional RNA sequencing of *Balamuthia* will be  
345 needed to predict transcripts, identify splice junctions, and enable complete  
346 annotation of the genome.

347         In summary, we demonstrate here that the availability of pathogen  
348 reference genomes is critical for the sensitivity and success of unbiased  
349 metagenomic next-generation sequencing approaches in diagnosing infectious  
350 disease. In hindsight, more timely and potentially actionable diagnosis at  
351 hospital day 1 in a fatal case of PAM from *Balamuthia mandrillaris* would have  
352 required the availability of the full genome sequence. Thus, in addition to  
353 revealing a significant amount of evolutionary diversity, the draft genome of  
354 *Balamuthia mandrillaris* presented here will improve the sensitivity of  
355 sequencing-based efforts for diagnosis and surveillance, and can be used to  
356 guide the development of targeted assays for genotyping and detection. The  
357 draft genome also constitutes a valuable resource for future studies investigating  
358 the biology of this eukaryotic pathogen and its etiologic role in PAM.



359

360

## 361 **METHODS**

362

### 363 **Ethics**

364 Informed consent was obtained from the patient's parents for analysis of her  
365 clinical samples. This study was approved by the Colorado Multiple Institutional  
366 Review Board (IRB). Coded samples were analyzed for pathogens by NGS  
367 under protocols approved by the University of California, San Francisco IRB.

368

369

### 370 **Metagenomic Sequencing of CSF and Brain Biopsy**

371 Total nucleic acid was extracted from 200  $\mu$ L of CSF using the Qiagen  
372 EZ1 Viral kit. Half of the nucleic acid from CSF was treated with Turbo DNase  
373 (Ambion). Total RNA was extracted from 2 mm<sup>3</sup> brain biopsy tissue using the  
374 Direct-zol RNA MiniPrep Kit (Zymo Research), followed by mRNA purification  
375 using the Oligotex mRNA Mini Kit (Qiagen). Total RNA from CSF and mRNA  
376 from brain biopsy was reverse-transcribed using random hexamers and randomly  
377 amplified as previously described (Greninger et al. 2015b). The resulting double-  
378 stranded cDNA or extracted DNA from CSF (the fraction not treated with Turbo  
379 DNase) was used as input into Nextera XT, following the manufacturer's protocol  
380 except with reagent volumes cut in half for each step in the protocol. After 14-18  
381 cycles of PCR amplification, barcoded libraries were cleaned using Ampure XP

382 beads, quantitated on the BioAnalyzer (Agilent), and run on the Illumina MiSeq (1  
383 x 160 bp run). Metagenomic NGS data were analyzed for pathogens via SURPI  
384 using NCBI nt/nr databases from June 2014 (Naccache et al. 2014).

385 A rapid taxonomic classification algorithm based on the lowest common  
386 ancestor was incorporated into SURPI, as previously described (Greninger et al.  
387 2015b), and used to assign viral, bacterial, and non-chordate eukaryotic NGS  
388 reads to the species, genus, or family level. For the SNAP nucleotide aligner  
389 (Zaharia et al. 2011), an edit distance cutoff of 12 was used for viral reads  
390 (Naccache et al. 2014), but adjusted to a more stringent edit distance of 6 for  
391 bacterial and non-chordate eukaryotic reads to increase specificity.

392

### 393 **Propagation of *Balamuthia mandrillaris* in culture**

394 Trypsin-treated cultures from Vero or BHK cell monolayers and  
395 *Balamuthia mandrillaris* 2046 strain amoebas were placed into T25 culture flasks  
396 in Dulbecco's Modified Eagle Medium (DMEM) plus 10% bovine serum, 1% of  
397 the antibiotics 100 U/mL penicillin, 0.1 mg/mL streptomycin, and 0.25 µg/mL  
398 fungizone and incubated at 37° CO<sub>2</sub> for 7 to 10 days plus 2 days at room  
399 temperature until the underlying cell sheet was completely destroyed and only  
400 actively dividing amoebae were seen floating and/or attached to the surface.  
401 Attached amoebas were freed by gently tapping the side of the flask or putting  
402 the flask on a bed of ice for 20 minutes. The amoebas were concentrated by  
403 centrifugation for 5 minutes. After removal of supernatant, the amoeba pellet was  
404 washed by addition of PBS, centrifuged again, and then placed in a flask with

405 Bacto-casitone axenic medium and allowed to grow for another 7-10 days, after  
406 which the amoebas were concentrated again, washed, and placed into fresh  
407 axenic medium. After a final centrifugation step, the amoebae were collected,  
408 washed 3X in PBS, pelleted, and stored at -80° C.

409 The fluid drained, the amoeba pellet was washed by adding PBS,  
410 centrifuged followed by placing the amoebas in a flask with Bacto-casitone  
411 axenic medium and allowed to grow for 7-10 days, collected again and placed  
412 into fresh axenic medium (Lares-Jimenez et al. 2015). The amoebae were  
413 collected, washed 3X in PBS, pelleted, stored at -80°C.

414

#### 415 **Sequencing and annotation of cultured *Balamuthia mandrillaris* 2046 strain**

416 DNA from *Balamuthia mandrillaris* 2046 strain was extracted using the  
417 Qiagen EZ1 Tissue Kit and used as input for the Nextera Mate Pair Kit (Illumina)  
418 and Nextera XT Kit (Illumina), following the manufacturer's instructions. Mate-pair  
419 libraries were sequenced on an Illumina MiSeq (2x80nt run and 2x300 nt), while  
420 the Nextera XT library was sequenced on an Illumina HiSeq (2x250bp paired-end  
421 sequencing) (Table 2). Mate-pair reads from run MP1 were adapter-trimmed with  
422 NxTrim (O'Connell et al. 2015), and the mitochondrial genome of strain 2046 and  
423 high-copy number contigs were assembled using SPAdes v3.5 (Bankevich et al.  
424 2012; Greninger et al. 2015a). The average insert size of the mate-pair library  
425 was 2,187 nucleotides. Prediction of tRNA and rRNA genes were performed  
426 using tRNAscan-SE and RNAmmer v1.2, respectively (Lowe and Eddy 1997;  
427 Lagesen et al. 2007). ORFs were predicted in translation code 4 with the

428 Glimmer gene predictor, and all predicted ORF sequences were confirmed using  
429 BLASTx and HHPred (Altschul et al. 1990; Soding et al. 2005).

430 Reads from runs MP2 and MP3 were mate-pair adapter-trimmed using  
431 NxTrim, while reads from all runs were quality-filtered (q30) and adapter-trimmed  
432 using cutadapt (Martin 2011). Reads that aligned to the *Balamuthia*  
433 mitochondrial genome and golden hamster (*Mesocricetus auratus*) were  
434 identified using SNAP (Zaharia et al. 2011) and removed prior to *de novo*  
435 assembly using platanus (Kajitani et al. 2014). Any scaffold of length less than  
436 500 bp along with 62 scaffolds that aligned to *Mesocricetus auratus*, *Chlorocephus*  
437 *sabaeus*, *Waddlia chondrophila*, and *Enterobacteria phage phiX174* (all likely  
438 deriving from cell culture contamination), were removed.

439

#### 440 **Quantitative RT-PCR**

441 qRT-PCR of the *Balamuthia mandrillaris* 28S gene was performed using 20  $\mu$ L  
442 total reactions of the Quantitect qRT-PCR Sybr Green kit (Qiagen) with 1  $\mu$ L of  
443 extracted nucleic acid. Conditions were 50°C x 30 min, 95°C x 15 min, followed  
444 by 40 cycles of 95°C x 15 s, 60°C x 60 s using a final 0.5  $\mu$ M concentration of  
445 each primer Bal-28S-F (5'-CTAGCCGTGCTGTAGAGTCG-3') and Bal-28S-R (5'-  
446 CGGTCTCGAGCTTTTCCCTT-3').

447

#### 448 **Rps3 PCR confirmation**

449 Genomic DNA was PCR-amplified using 0.5  $\mu$ M final concentration of primers  
450 rps3-F (5'-CTGYTCGATTTTCGAAAAATAAAGTAG-3') and rps3-R (5'-

451 TGAAAGAAGAACATTTAGATCACGACT-3') using 2X iProof HF Master Mix  
452 (Bio-Rad) in 20  $\mu$ L total volume. Conditions were 95°C x 2 min, followed by 35  
453 cycles of 95°C x 30 s, 52°C x 30 s, 72°C x 40 sec and a final incubation at 72°C  
454 x 2 min. PCR amplicons were visualized by 3% agarose gel electrophoresis.

455

## 456 **DATA ACCESS**

457 The *Balamuthia mandrillaris* mitochondrial genomes have been deposited in  
458 NCBI under the following accession numbers: 2046 axenic (KP888565), 2046-1  
459 (KT175740), V451 (KT030670), OK1 (KT030671), RP-5 (KT030672), SAM  
460 (KT030673), V188-axenic (KT175738), V188-frozen stock (KT175739), V039  
461 (KT175741). The *Balamuthia mandrillaris* scaffolds have been deposited in NCBI  
462 WGS under the accession number LEOU00000000. Metagenomic NGS data  
463 from the brain biopsy and CSF fluid corresponding to non-human reads have  
464 been submitted to the NCBI Sequence Read Archive (SRA). NGS reads were  
465 filtered for exclusion of human sequences by both BLASTn alignment at an e-  
466 value cutoff of  $10^{-5}$  and Bowtie2 high-sensitivity local alignment to the human  
467 hg38 reference database.

468

## 469 **ACKNOWLEDGEMENTS**

470 This study was supported by grants from the National Institutes of Health  
471 (NIH) R01-HL105704 (to CYC) and UL1-TR001082 (to KM and SD), the Centers  
472 for Disease Control and Prevention (CDC) Emerging Infections Program

473 U50/CCU915546-09 (CG), a University of California Discovery Award (CYC), and  
474 an Abbott Pathogen Discovery Award (CYC).

475

#### 476 **AUTHOR CONTRIBUTIONS**

477 ALG, KM, SD, and CYC conceived of and designed the study. ALG, TD,  
478 JB, SY performed the experiments. KM, DM, YN, MV, CAP, BKK, and SR took  
479 care of patients with *Balamuthia* infection and contributed clinical samples. KM,  
480 DM, CG, MV, CAP, BKK, SR, and CYC analyzed the clinical and epidemiological  
481 data. ALG, SNN, SF, JB, and CYC analyzed the genomic sequencing data. ALG,  
482 SNN, SF, and CYC developed and contributed software analysis tools. ALG, KM,  
483 and CYC wrote the manuscript.

484

#### 485 **DISCLOSURE DECLARATION**

486 CYC is the director of the UCSF-Abbott Viral Diagnostics and Discovery  
487 Center (VDDC) and receives research support in pathogen discovery from Abbott  
488 Laboratories, Inc.

489

#### 490 **FIGURE LEGENDS**

491

492 **Figure 1 – Sequencing and comparative phylogenetic analysis of the**  
493 **mitochondrial genome of *Balamuthia mandrillaris*. (A) *Balamuthia***  
494 ***mandrillaris* 2046 mitochondrial genome. Annotation of the 41,656 bp genome**  
495 **was performed using RNAmmer, tRNAscan-SE, and Glimmer gene predictor,**

496 with all ORFs manually verified using BLASTx alignment. **(B)** Phylogenetic  
497 analysis of 7 newly sequenced genomes from different strains of *Balamuthia*  
498 *mandrillaris*. An outgroup (e.g. *Acanthamoeba castellanii*) is not shown given the  
499 lack of gene synteny. Branch lengths are drawn proportionally to the number of  
500 nucleotide substitutions per position, and support values are shown for each  
501 node. **(C)** Differences in individual gene features (cox1, 23S rRNA, and rps3),  
502 among the 7 mitochondrial genomes, as detailed in the text.

503

504 **Figure 2 – PCR amplification of the *Balamuthia* rps3 mitochondrial gene.**

505 The variable length of the rps3 intron among 8 different *Balamuthia* strains (7  
506 newly sequenced mitochondrial genomes and the case patient) suggests that  
507 this gene may be an attractive target for development of a molecular genotyping  
508 assay. Column 4 corresponds to the DNA ladder (faint appearance), while  
509 columns 2 and 3 correspond to an additional clinical *Balamuthia* isolate whose  
510 mitochondrial genome was not sequenced.

511

512 **Figure 3 – Phylogenetic trees of the mitochondrial cox1 protein and 28S**  
513 **rRNA gene reveal the close phylogenetic relationship between *Balamuthia***

514 **and *Acanthamoeba*. (A)** Phylogeny of 7 *Balamuthia* cox1 amino acid  
515 sequences along with the top complete sequence hits in NCBI nr ranked by  
516 BLASTp E-score. **(B)** Phylogeny of 7 *Balamuthia* 23S rRNA nucleotide  
517 sequences along with the top complete sequence hits in NCBI nt ranked by  
518 BLASTn E-score. Sequences were aligned using MUSCLE and a phylogenetic

519 tree constructed using MrBayes. Branch lengths are drawn proportionally to the  
520 number of nucleotide substitutions per position, and support values are shown for  
521 each node.

522 .

523 **Figure 4 – Magnetic resonance imaging and histopathology from a 15-year**

524 **old patient with a fulminant acute encephalitis. (A)** A hospital day (HD) 1

525 coronal T2-weighted MR image, demonstrating a hemorrhagic lesion with

526 surrounding edema within the superior left frontal lobe (left panel, white arrow)

527 and left occipital lobe (right panel, white arrow). **(B)** A HD 5 contrast-enhanced

528 T1 weighted MR image, revealing enlargement of the pre-existing left frontal lobe

529 lesion (left panel, white arrow), as well as interval development of numerous

530 additional rim-enhancing lesions in multiple regions (right panel, white arrows).

531 **(C)** 20X (left and right panels) and 100X fields of view (right panel, inset) of a

532 brain biopsy specimen from the patient demonstrating numerous viable, large

533 ameba (black arrows), with abundant basophilic vacuolated cytoplasm, round

534 central nucleus, and prominent nucleolus, consistent with *Balamuthia*

535 *mandrillaris*. There were areas of extensive hemorrhagic necrosis accompanied

536 by a polymorphous inflammatory cell infiltrate including neutrophils and

537 eosinophils (right panel).

538

539 **Figure 5 – Identification of *Balamuthia mandrillaris* infection by**

540 **metagenomic next-generation sequencing (NGS). (A)** Coverage maps (blue

541 gradient) and pairwise identity plots (magenta gradient) of 2 of the 3 available



542 sequences from *Balamuthia* (16S/18S rRNA genes) in the NCBI nt reference  
543 database as of August 2015 and prior to sequencing of the draft genome.  
544 Shown are coverage maps corresponding to day 6 DNA and RNA libraries from  
545 CSF and a day 6 mRNA library from brain biopsy. No hits to 16S and 18S  
546 *Balamuthia* sequences were seen from day 1 samples. The asterisk denotes an  
547 area with artificially low coverage after taxonomic classification of the NGS reads  
548 due to high conservation among eukaryotic sequences (e.g. human, *Balamuthia*,  
549 etc.) within that region **(B)** A bar graph of the number of species-specific NGS  
550 reads aligning to *Balamuthia* 16S/18S rRNA (blue) or the *Balamuthia* genome  
551 (orange) in day 1 or day 6 samples. Note that with the availability of the newly  
552 assembled 44Mb *Balamuthia* genome, diagnosis of *Balamuthia mandrillaris*  
553 encephalitis at day 1 would have possible by detection of 9 species-specific  
554 reads (red boldface). **(C)** Coverage maps of two large scaffolds, ~216 kB and  
555 ~222 kB in size, from the *Balamuthia* draft genome, showing 8 out of 926 hits to  
556 *Balamuthia* in the day 6 CSF DNA library that are identified by SURPI after the  
557 draft genome sequence is added to the reference database (versus only 13 hits  
558 previously).  
559  
560

561 **Table 1 – Strains used in this study**

| Strain    | Date        | Location         | Note                                                                                 | Citation                      |
|-----------|-------------|------------------|--------------------------------------------------------------------------------------|-------------------------------|
| SAM**     | Spring 2001 | Rohnert Park, CA | 3 yo girl, cultured on Vero cells                                                    | Bakardjiev A et al. 2002      |
| RP-5**    | Spring 2001 | Rohnert Park, CA | environmental sample associated with SAm, cultured on Vero cells                     | Schuster FL et al. 2003       |
| OK1**     | 2002        | Oakland, CA      | environmental sample in NorCal unrelated to SAm, cultured on Vero cells              | Dunnebacke TH et al. 2004     |
| V039*     | 1990        | San Diego, CA    | type strain isolated from pregnant mandrill at San Diego Zoo, cultured on Vero cells | Visvesvara GS et al. 1990     |
| V188**    | 1989        | Georgia          | 59 yo man, amoeba isolated from brain/skin lesion, cultured on Vero cells            | Gordon SM et al. 1992         |
| V451**    | N/A         | New York         | 6 yo girl, cultured on Vero cells                                                    | Yang XH et al. 2001           |
| 2046**    | March 2010  | Walnut Creek, CA | 26 yo man, survivor, cultured on Vero cells                                          | Vollmer and Glaser, in review |
| CSF108*** | May 2015    | Colorado         | 15 yo girl, direct metagenomic detection from CSF                                    |                               |

\*strain obtained from ATCC (V39)

\*\*strain obtained from California Department of Public Health

\*\*\*strain obtained from recent clinical case in Colorado

562

563

564 **Table 2 – Sequencing runs and genome assembly details**

565

| Sequencing run                              | Raw reads | Filtered reads | Read Length | Library Prep      |
|---------------------------------------------|-----------|----------------|-------------|-------------------|
| MP1*                                        | 3845734   | N/A            | 2x80bp      | Nextera Mate-Pair |
| MP2*                                        | 31223454  | 12095792       | 2x80bp      | Nextera Mate-Pair |
| MP3*                                        | 14121900  | 4397510        | 2x250bp     | Nextera Mate-Pair |
| PE1**                                       | 213604902 | 29314946       | 2x250bp     | Nextera XT        |
| Assembly***                                 | Contigs   | N50 (bp)       |             |                   |
| Mitochondria                                | 1         | 41,656         | 41,656      |                   |
| contigs                                     | 31,194    | 3,411          | 48938887    |                   |
| scaffolds                                   | 26,811    | 19,415         | 49120517    |                   |
| gap-fill                                    | 26,811    | 19,012         | 48939625    |                   |
| Final assembly (minus <500bp, contaminants) | 14,699    | 26,144         | 44270879    |                   |

\*3 runs of a Nextera mate-pair library of strain 2046 from axenic culture sequenced on an Illumina MiSeq

\*\*Nextera XT paired-end library of strain 2046 sequenced on an Illumina HiSeq

\*\*\*assembly of mitochondrial genome from MP1 library, of whole-genome from all 4 libraries

566

567

568 **Table 3 - *Balamuthia mandrillaris* reads from the day 1 patient sample**

| Read # | top NCBI NR match by BLASTx                                         | % amino acid identity | E-value  | matched scaffold in <i>Balamuthia</i> genome | % nucleotide identity ( <i>Balamuthia</i> genome) | E-value ( <i>Balamuthia</i> genome) |
|--------|---------------------------------------------------------------------|-----------------------|----------|----------------------------------------------|---------------------------------------------------|-------------------------------------|
| 1      | none                                                                | –                     | –        | scaffold46                                   | 96%                                               | 5.00E-29                            |
| 2      | none                                                                | –                     | –        | scaffold26764                                | 96%                                               | 3.00E-27                            |
| 3      | none                                                                | –                     | –        | scaffold45                                   | 100%                                              | 3.00E-36                            |
| 4      | none                                                                | –                     | –        | scaffold353                                  | 98%                                               | 2.00E-24                            |
| 5      | fumareylacetoacetase [Flavobacteriales bacterium BRH_c54]           | 82%                   | 3.00E-05 | scaffold203                                  | 100%                                              | 3.00E-36                            |
| 6      | none                                                                | –                     | –        | scaffold106                                  | 96%                                               | 1.00E-26                            |
| 7      | glutathione transferase protein [Acanthamoeba castellani str. Neff] | 77%                   | 0.022    | scaffold30                                   | 99%                                               | 8.00E-34                            |
| 8      | none                                                                | –                     | –        | scaffold112                                  | 97%                                               | 7.00E-28                            |
| 9      | none                                                                | –                     | –        | scaffold511                                  | 98%                                               | 5.00E-26                            |

569

570

571 **Table S1 – SURPI clinical metagenomic results**

572

## REFERENCES

- Ahmad AF, Heaselgrave W, Andrew PW, Kilvington S. 2013. The in vitro efficacy of antimicrobial agents against the pathogenic free-living amoeba *Balamuthia mandrillaris*. *The Journal of eukaryotic microbiology* **60**(5): 539-543.
- Altschul SF, Gish W, Miller W, Myers EW, Lipman DJ. 1990. Basic local alignment search tool. *Journal of molecular biology* **215**(3): 403-410.
- Bakardjiev A, Azimi PH, Ashouri N, Ascher DP, Janner D, Schuster FL, Visvesvara GS, Glaser C. 2003. Amebic encephalitis caused by *Balamuthia mandrillaris*: report of four cases. *The Pediatric infectious disease journal* **22**(5): 447-453.
- Bankevich A, Nurk S, Antipov D, Gurevich AA, Dvorkin M, Kulikov AS, Lesin VM, Nikolenko SI, Pham S, Prjibelski AD et al. 2012. SPAdes: a new genome assembly algorithm and its applications to single-cell sequencing. *Journal of computational biology : a journal of computational molecular cell biology* **19**(5): 455-477.
- Booton GC, Carmichael JR, Visvesvara GS, Byers TJ, Fuerst PA. 2003. Genotyping of *Balamuthia mandrillaris* based on nuclear 18S and mitochondrial 16S rRNA genes. *The American journal of tropical medicine and hygiene* **68**(1): 65-69.
- Briese T, Paweska JT, McMullan LK, Hutchison SK, Street C, Palacios G, Khristova ML, Weyer J, Swanepoel R, Egholm M et al. 2009. Genetic detection and characterization of Lujo virus, a new hemorrhagic fever-associated arenavirus from southern Africa. *PLoS pathogens* **5**(5): e1000455.
- Buchfink B, Xie C, Huson DH. 2015. Fast and sensitive protein alignment using DIAMOND. *Nature methods* **12**(1): 59-60.
- Burger G, Plante I, Lonergan KM, Gray MW. 1995. The mitochondrial DNA of the amoeboid protozoon, *Acanthamoeba castellanii*: complete sequence, gene content and genome organization. *Journal of molecular biology* **245**(5): 522-537.
- Centers for Disease C, Prevention. 2013. Investigational drug available directly from CDC for the treatment of infections with free-living amoebae. *MMWR Morbidity and mortality weekly report* **62**(33): 666.
- Chiu CY. 2013. Viral pathogen discovery. *Current opinion in microbiology* **16**(4): 468-478.
- Deetz TR, Sawyer MH, Billman G, Schuster FL, Visvesvara GS. 2003. Successful treatment of *Balamuthia* amoebic encephalitis: presentation of 2 cases. *Clinical infectious diseases : an official publication of the Infectious Diseases Society of America* **37**(10): 1304-1312.
- Freitas TA, Li PE, Scholz MB, Chain PS. 2015. Accurate read-based metagenome characterization using a hierarchical suite of unique signatures. *Nucleic acids research* **43**(10): e69.

- Fricke WF, Rasko DA. 2014. Bacterial genome sequencing in the clinic: bioinformatic challenges and solutions. *Nature reviews Genetics* **15**(1): 49-55.
- Fukami H, Chen CA, Chiou CY, Knowlton N. 2007. Novel group I introns encoding a putative homing endonuclease in the mitochondrial *cox1* gene of Scleractinian corals. *Journal of molecular evolution* **64**(5): 591-600.
- Grad YH, Lipsitch M. 2014. Epidemiologic data and pathogen genome sequences: a powerful synergy for public health. *Genome biology* **15**(11): 538.
- Greninger AL, Chorny I, Knowles S, Ng VL, Chaturvedi V. 2015a. Draft Genome Sequences of Four NDM-1-Producing *Klebsiella pneumoniae* Strains from a Health Care Facility in Northern California. *Genome announcements* **3**(3).
- Greninger AL, Naccache SN, Messacar K, Clayton A, Yu G, Somasekar S, Federman S, Stryke D, Anderson C, Yagi S et al. 2015b. A novel outbreak enterovirus D68 strain associated with acute flaccid myelitis cases in the USA (2012-14): a retrospective cohort study. *The Lancet Infectious diseases* **15**(6): 671-682.
- Herman EK, Greninger AL, Visvesvara GS, Marciano-Cabral F, Dacks JB, Chiu CY. 2013. The mitochondrial genome and a 60-kb nuclear DNA segment from *Naegleria fowleri*, the causative agent of primary amoebic meningoencephalitis. *The Journal of eukaryotic microbiology* **60**(2): 179-191.
- Kajitani R, Toshimoto K, Noguchi H, Toyoda A, Ogura Y, Okuno M, Yabana M, Harada M, Nagayasu E, Maruyama H et al. 2014. Efficient de novo assembly of highly heterozygous genomes from whole-genome shotgun short reads. *Genome research* **24**(8): 1384-1395.
- Kato H, Mitake S, Yuasa H, Hayashi S, Hara T, Matsukawa N. 2013. Successful treatment of granulomatous amoebic encephalitis with combination antimicrobial therapy. *Internal medicine* **52**(17): 1977-1981.
- Kordis D. 2005. A genomic perspective on the chromodomain-containing retrotransposons: Chromoviruses. *Gene* **347**(2): 161-173.
- Lagesen K, Hallin P, Rodland EA, Staerfeldt HH, Rognes T, Ussery DW. 2007. RNAmmer: consistent and rapid annotation of ribosomal RNA genes. *Nucleic acids research* **35**(9): 3100-3108.
- Lares-Jimenez LF, Gamez-Gutierrez RA, Lares-Villa F. 2015. Novel culture medium for the axenic growth of *Balamuthia mandrillaris*. *Diagnostic microbiology and infectious disease* **82**(4): 286-288.
- Laroche J, Bousquet J. 1999. Evolution of the mitochondrial *rps3* intron in perennial and annual angiosperms and homology to *nad5* intron 1. *Molecular biology and evolution* **16**(4): 441-452.
- Lowe TM, Eddy SR. 1997. tRNAscan-SE: a program for improved detection of transfer RNA genes in genomic sequence. *Nucleic acids research* **25**(5): 955-964.
- Martin M. 2011. Cutadapt removes adapter sequences from high-throughput sequencing reads. *EMBnetjournal* **17**(1).

- Martinez DY, Seas C, Bravo F, Legua P, Ramos C, Cabello AM, Gotuzzo E. 2010. Successful treatment of Balamuthia mandrillaris amoebic infection with extensive neurological and cutaneous involvement. *Clinical infectious diseases : an official publication of the Infectious Diseases Society of America* **51**(2): e7-11.
- Matin A, Siddiqui R, Jayasekera S, Khan NA. 2008. Increasing importance of Balamuthia mandrillaris. *Clinical microbiology reviews* **21**(3): 435-448.
- Naccache SN, Federman S, Veeraraghavan N, Zaharia M, Lee D, Samayoa E, Bouquet J, Greninger AL, Luk KC, Enge B et al. 2014. A cloud-compatible bioinformatics pipeline for ultrarapid pathogen identification from next-generation sequencing of clinical samples. *Genome research* **24**(7): 1180-1192.
- Naccache SN, Peggs KS, Mattes FM, Phadke R, Garson JA, Grant P, Samayoa E, Federman S, Miller S, Lunn MP et al. 2015. Diagnosis of neuroinvasive astrovirus infection in an immunocompromised adult with encephalitis by unbiased next-generation sequencing. *Clinical infectious diseases : an official publication of the Infectious Diseases Society of America* **60**(6): 919-923.
- O'Connell J, Schulz-Trieglaff O, Carlson E, Hims MM, Gormley NA, Cox AJ. 2015. NxTrim: optimized trimming of Illumina mate pair reads. *Bioinformatics* **31**(12): 2035-2037.
- Perez MT, Bush LM. 2007. Fatal amebic encephalitis caused by Balamuthia mandrillaris in an immunocompetent host: a clinicopathological review of pathogenic free-living amoebae in human hosts. *Annals of diagnostic pathology* **11**(6): 440-447.
- Qvarnstrom Y, Visvesvara GS, Sriram R, da Silva AJ. 2006. Multiplex real-time PCR assay for simultaneous detection of Acanthamoeba spp., Balamuthia mandrillaris, and Naegleria fowleri. *Journal of clinical microbiology* **44**(10): 3589-3595.
- Regina TM, Picardi E, Lopez L, Pesole G, Quagliariello C. 2005. A novel additional group II intron distinguishes the mitochondrial rps3 gene in gymnosperms. *Journal of molecular evolution* **60**(2): 196-206.
- Schubert RD, Wilson MR. 2015. A tale of two approaches: how metagenomics and proteomics are shaping the future of encephalitis diagnostics. *Current opinion in neurology* **28**(3): 283-287.
- Schuster FL, Dunnebacke TH, Booton GC, Yagi S, Kohlmeier CK, Glaser C, Vugia D, Bakardjiev A, Azimi P, Maddux-Gonzalez M et al. 2003. Environmental isolation of Balamuthia mandrillaris associated with a case of amebic encephalitis. *Journal of clinical microbiology* **41**(7): 3175-3180.
- Schuster FL, Glaser C, Honarmand S, Maguire JH, Visvesvara GS. 2004. Balamuthia amoebic encephalitis risk, Hispanic Americans. *Emerging infectious diseases* **10**(8): 1510-1512.
- Schuster FL, Guglielmo BJ, Visvesvara GS. 2006. In-vitro activity of miltefosine and voriconazole on clinical isolates of free-living amoebas: Balamuthia mandrillaris, Acanthamoeba spp., and Naegleria fowleri. *The Journal of eukaryotic microbiology* **53**(2): 121-126.



- Schuster FL, Visvesvara GS. 1996. Axenic growth and drug sensitivity studies of *Balamuthia mandrillaris*, an agent of amebic meningoencephalitis in humans and other animals. *Journal of clinical microbiology* **34**(2): 385-388.
- Soding J, Biegert A, Lupas AN. 2005. The HHpred interactive server for protein homology detection and structure prediction. *Nucleic acids research* **33**(Web Server issue): W244-248.
- Visvesvara GS. 1993. Epidemiology of infections with free-living amebas and laboratory diagnosis of microsporidiosis. *The Mount Sinai journal of medicine, New York* **60**(4): 283-288.
- Visvesvara GS, Martinez AJ, Schuster FL, Leitch GJ, Wallace SV, Sawyer TK, Anderson M. 1990. Leptomyxid ameba, a new agent of amebic meningoencephalitis in humans and animals. *Journal of clinical microbiology* **28**(12): 2750-2756.
- Wilson MR, Naccache SN, Samayoa E, Biagtan M, Bashir H, Yu G, Salamat SM, Somasekar S, Federman S, Miller S et al. 2014. Actionable diagnosis of neuroleptospirosis by next-generation sequencing. *The New England journal of medicine* **370**(25): 2408-2417.
- Wood DE, Salzberg SL. 2014. Kraken: ultrafast metagenomic sequence classification using exact alignments. *Genome biology* **15**(3): R46.
- Yagi S, Booton GC, Visvesvara GS, Schuster FL. 2005. Detection of *Balamuthia* mitochondrial 16S rRNA gene DNA in clinical specimens by PCR. *Journal of clinical microbiology* **43**(7): 3192-3197.
- Zaharia M, Bolosky W, Curtis K, Fox A, Patterson D, Shenker S, Stoica I, Karp RM, Sittler T. 2011. Faster and more accurate sequence alignment with SNAP. *arXiv.org* **1111.5572**.
- Zheng Z, Jiang K, Huang C, Mei C, Han R. 2012. *Cordyceps militaris* (Hypocreales: Cordycipitaceae): transcriptional analysis and molecular characterization of *cox1* and group I intron with putative LAGLIDADG endonuclease. *World journal of microbiology & biotechnology* **28**(1): 371-380.
- Zysset-Burri DC, Muller N, Beuret C, Heller M, Schurch N, Gottstein B, Wittwer M. 2014. Genome-wide identification of pathogenicity factors of the free-living amoeba *Naegleria fowleri*. *BMC genomics* **15**: 496.

**A**

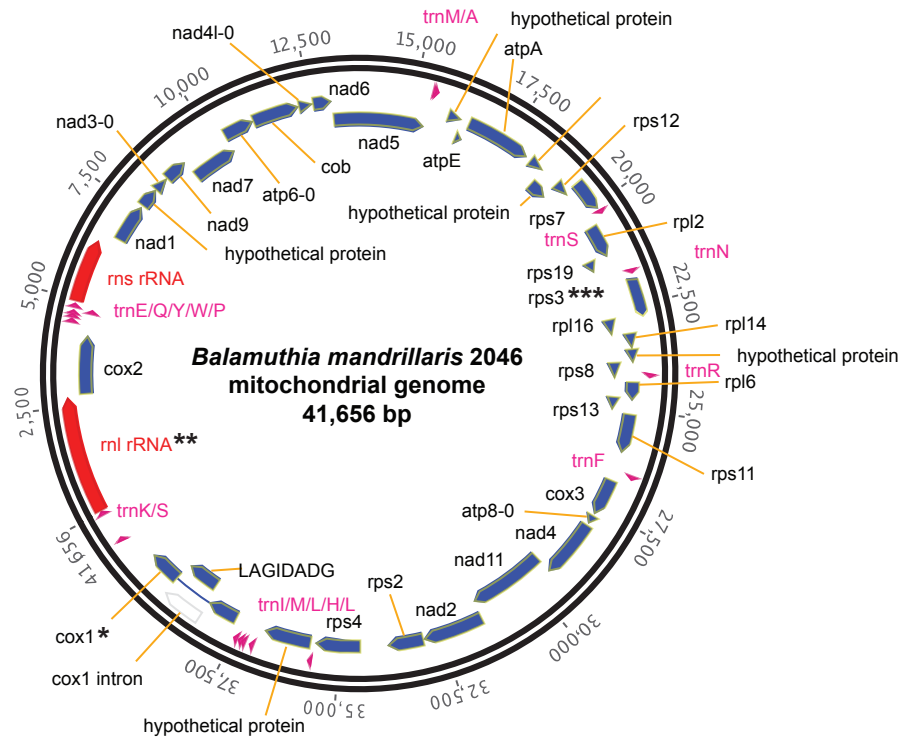

**B**

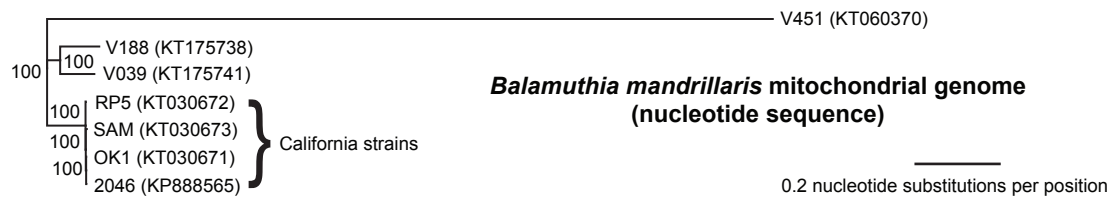

**C**

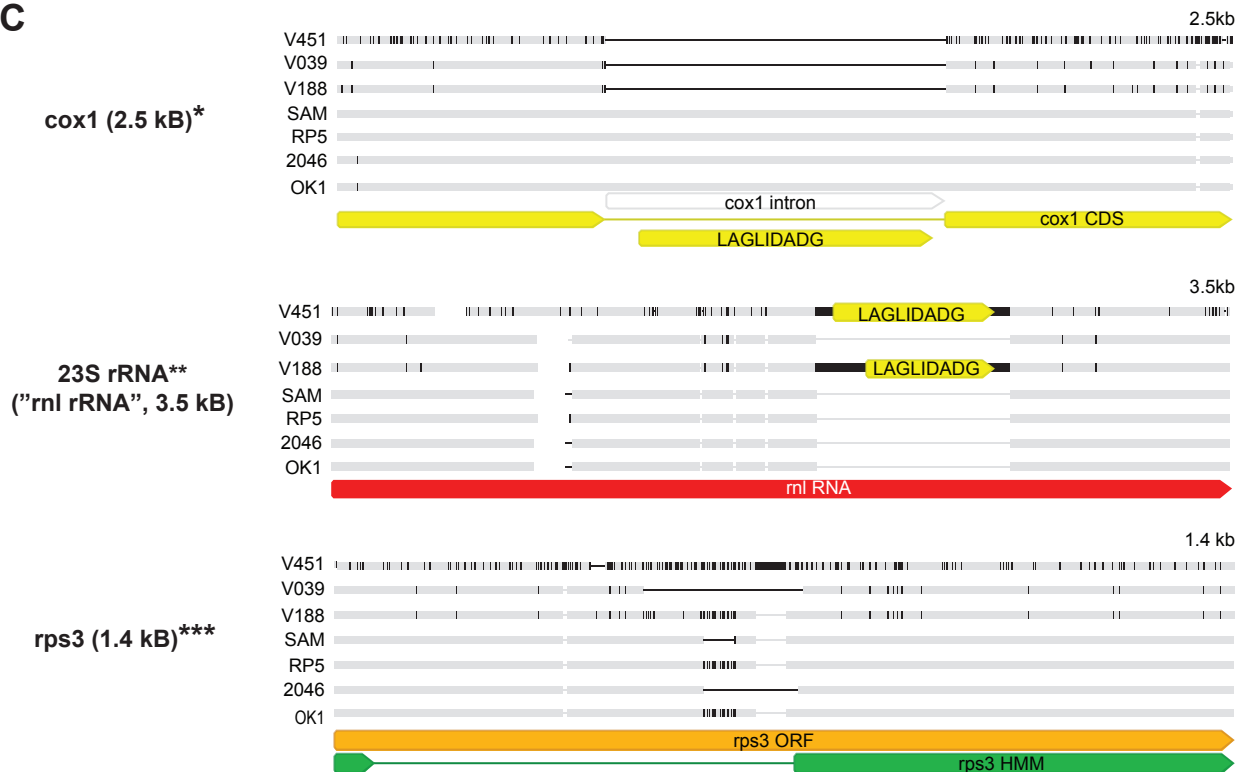

V188

V188 repeat

clinical isolate

clinical isolate

2046

RP5

SAM

OK1

V451

Case patient

V039

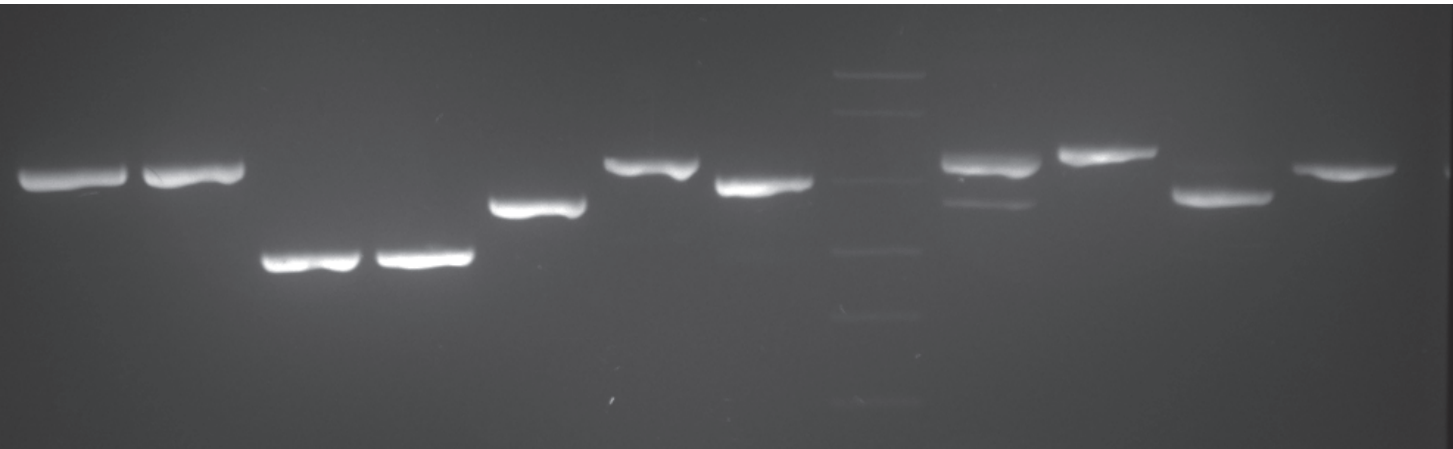

850 bp

650 bp

500 bp

400 bp

**A**

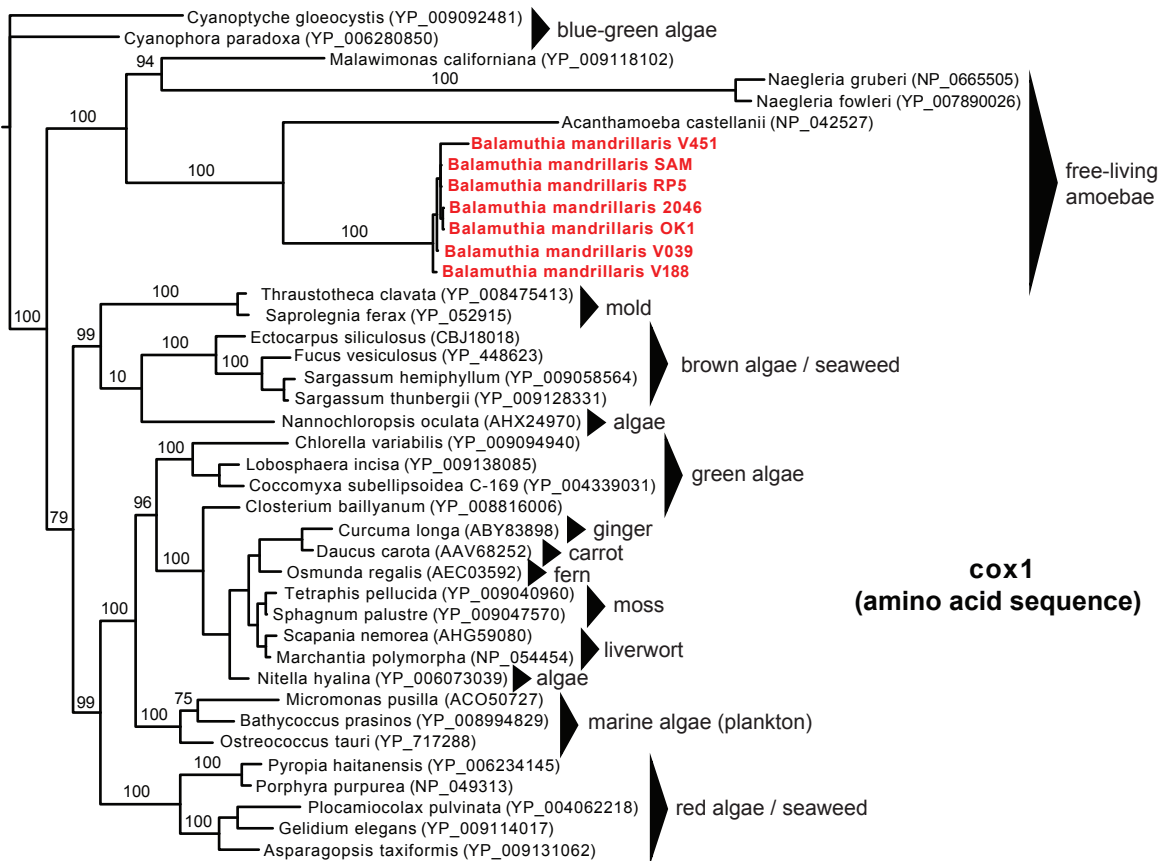

**B**

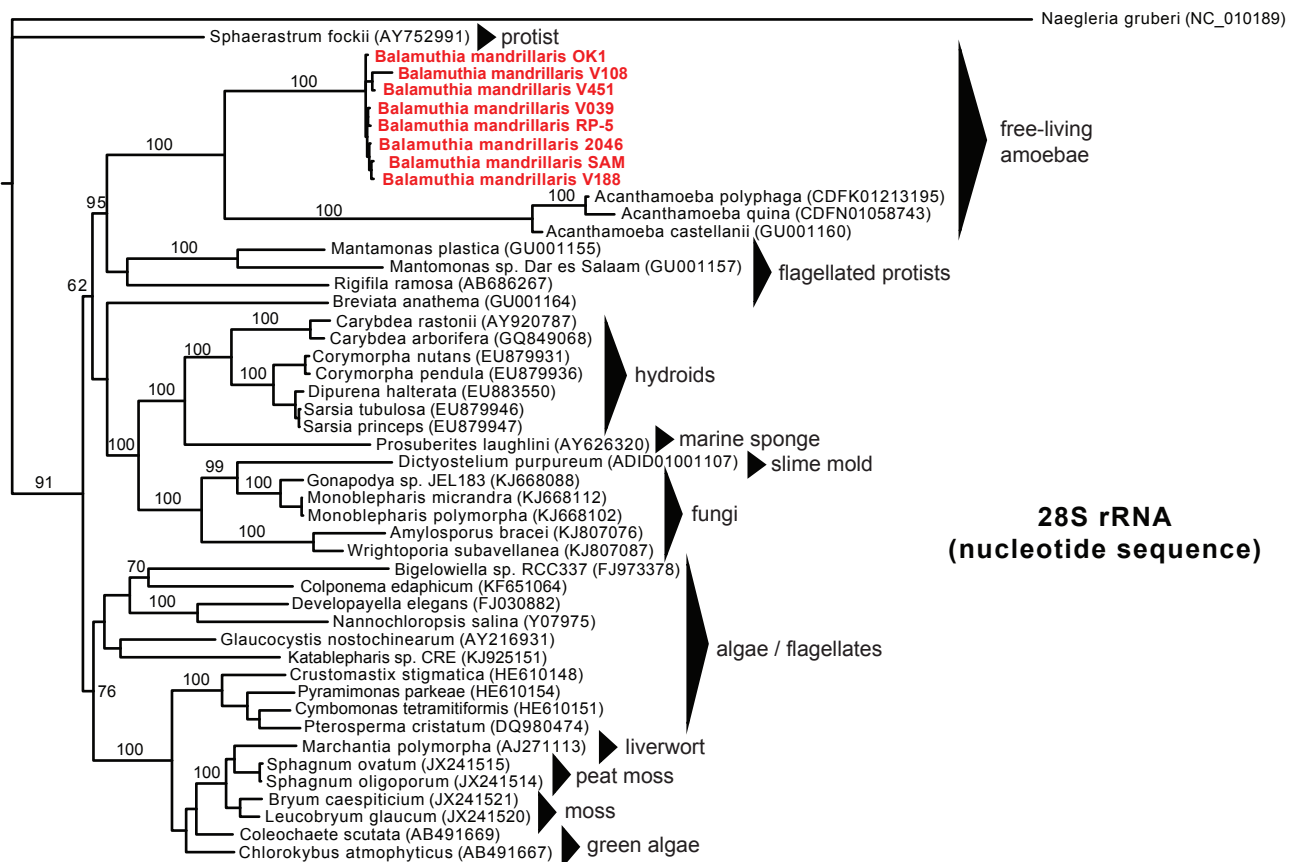

**A**

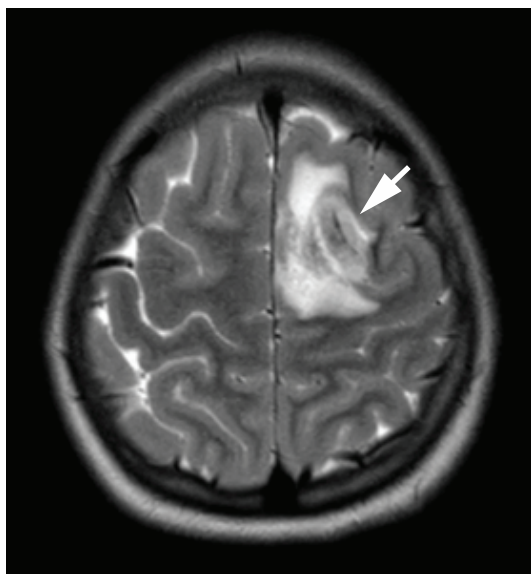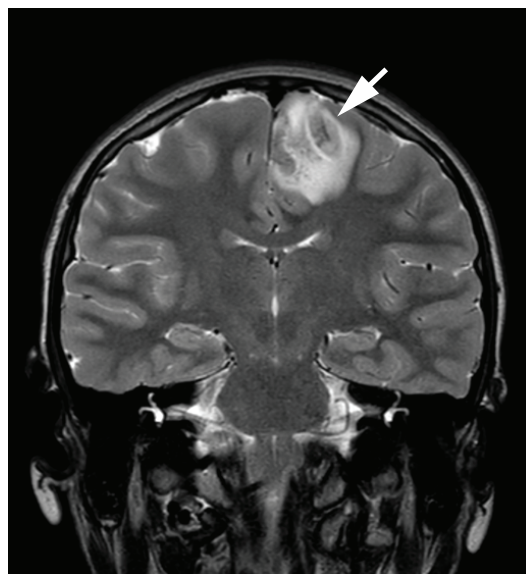

**B**

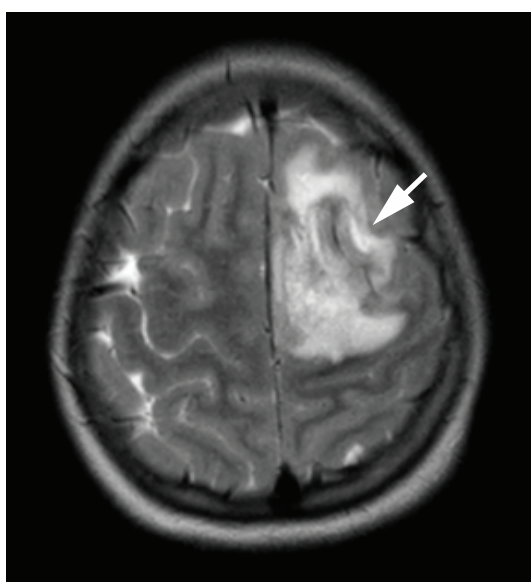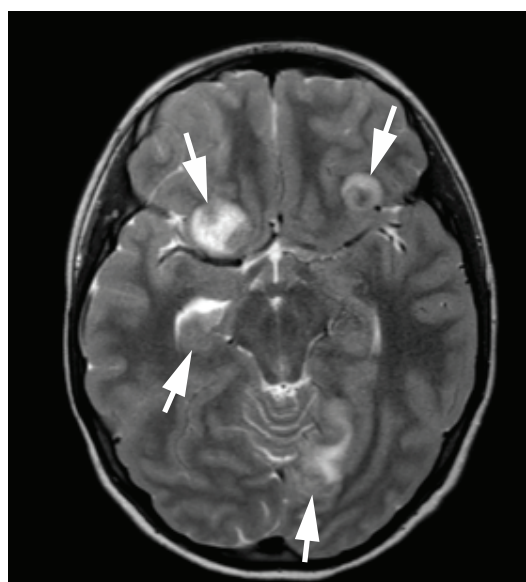

**C**

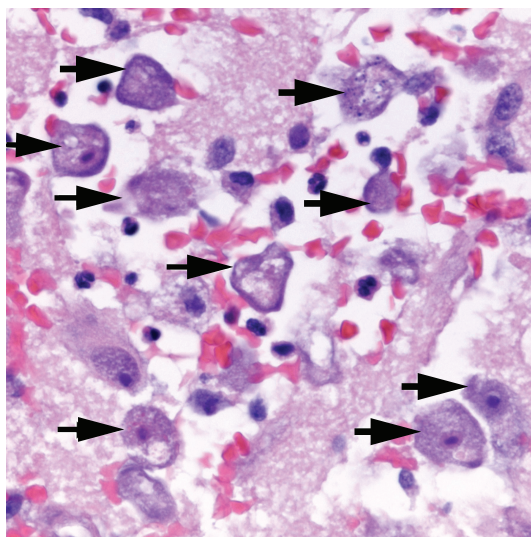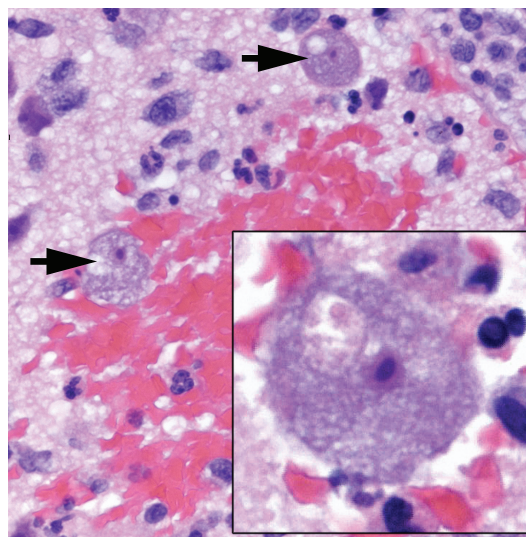

**A**

***Balamuthia* 16S/18S rRNA**

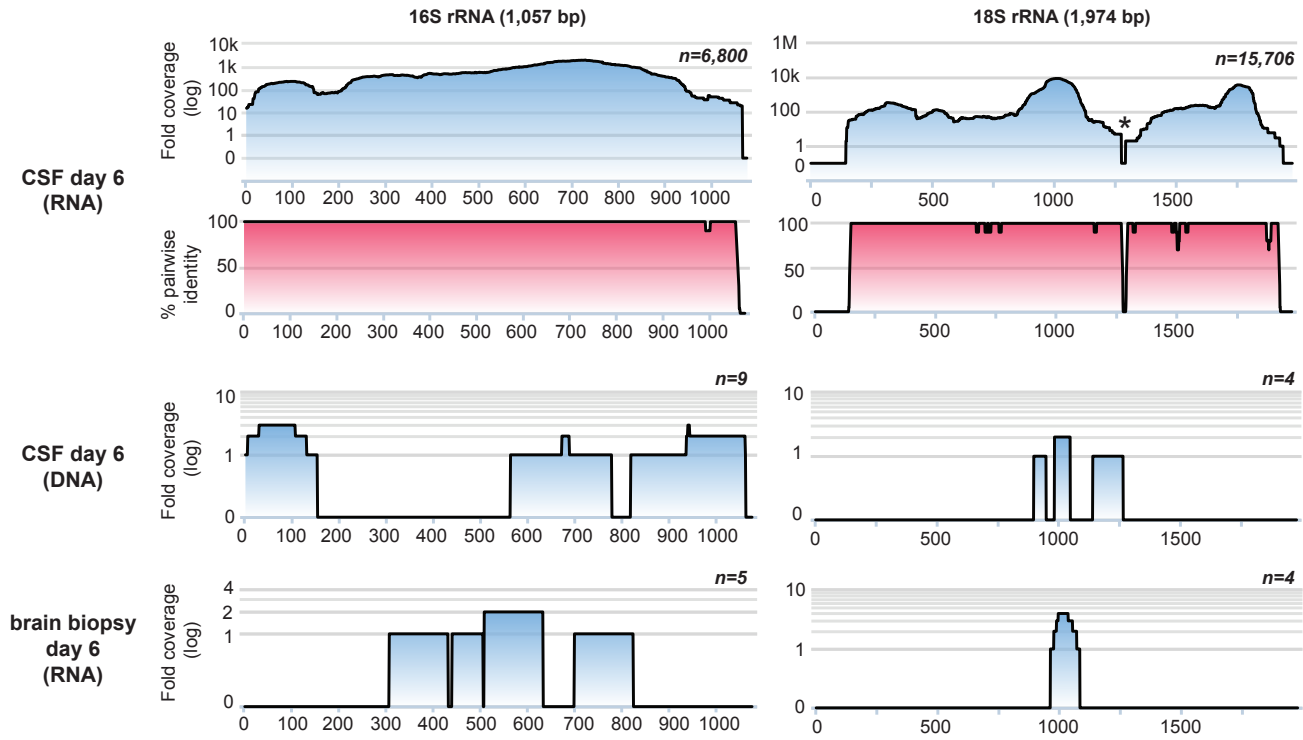

**B**

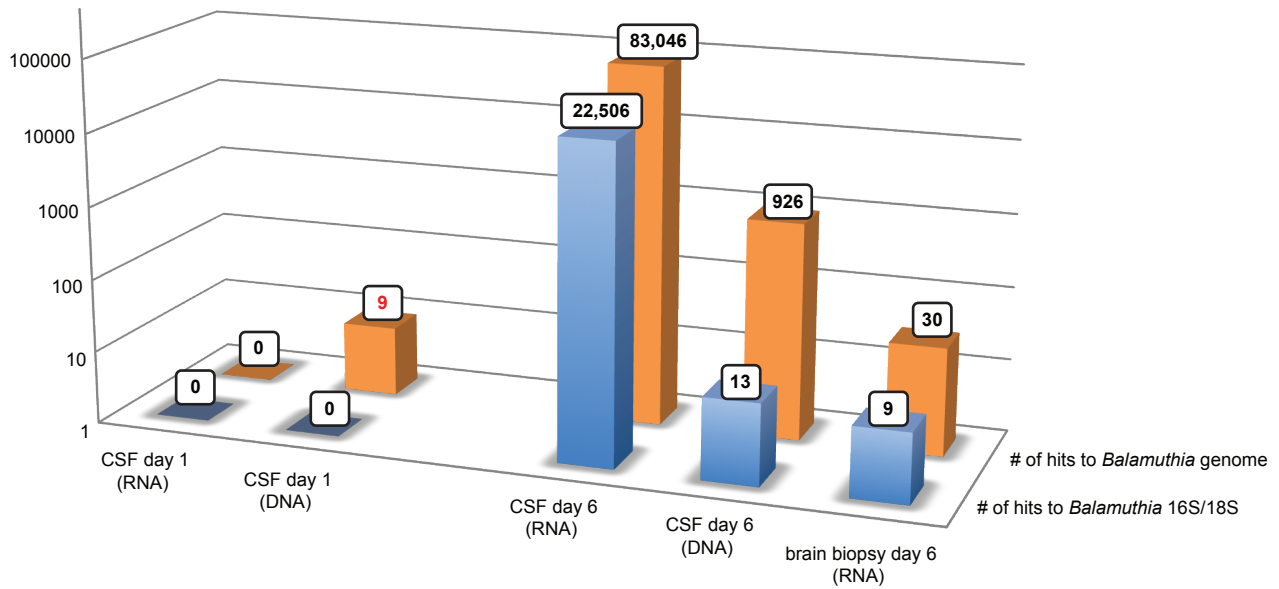

**C**

***Balamuthia* genome**

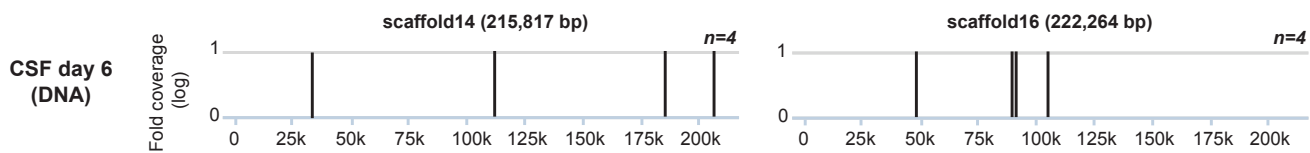

Source: http://biorxiv.org/content/10.1101/024455v1.full.pdf
